# Supplementary material
Source: PubMed Central journal article supplement (PMC3269887)
Supplement: NIHMS346796-supplement-01.pdf [file NIHMS346796-supplement-01.pdf]

Supplemental Figure S1. PPI scores and mean VOI peak activation by FRA task variant.

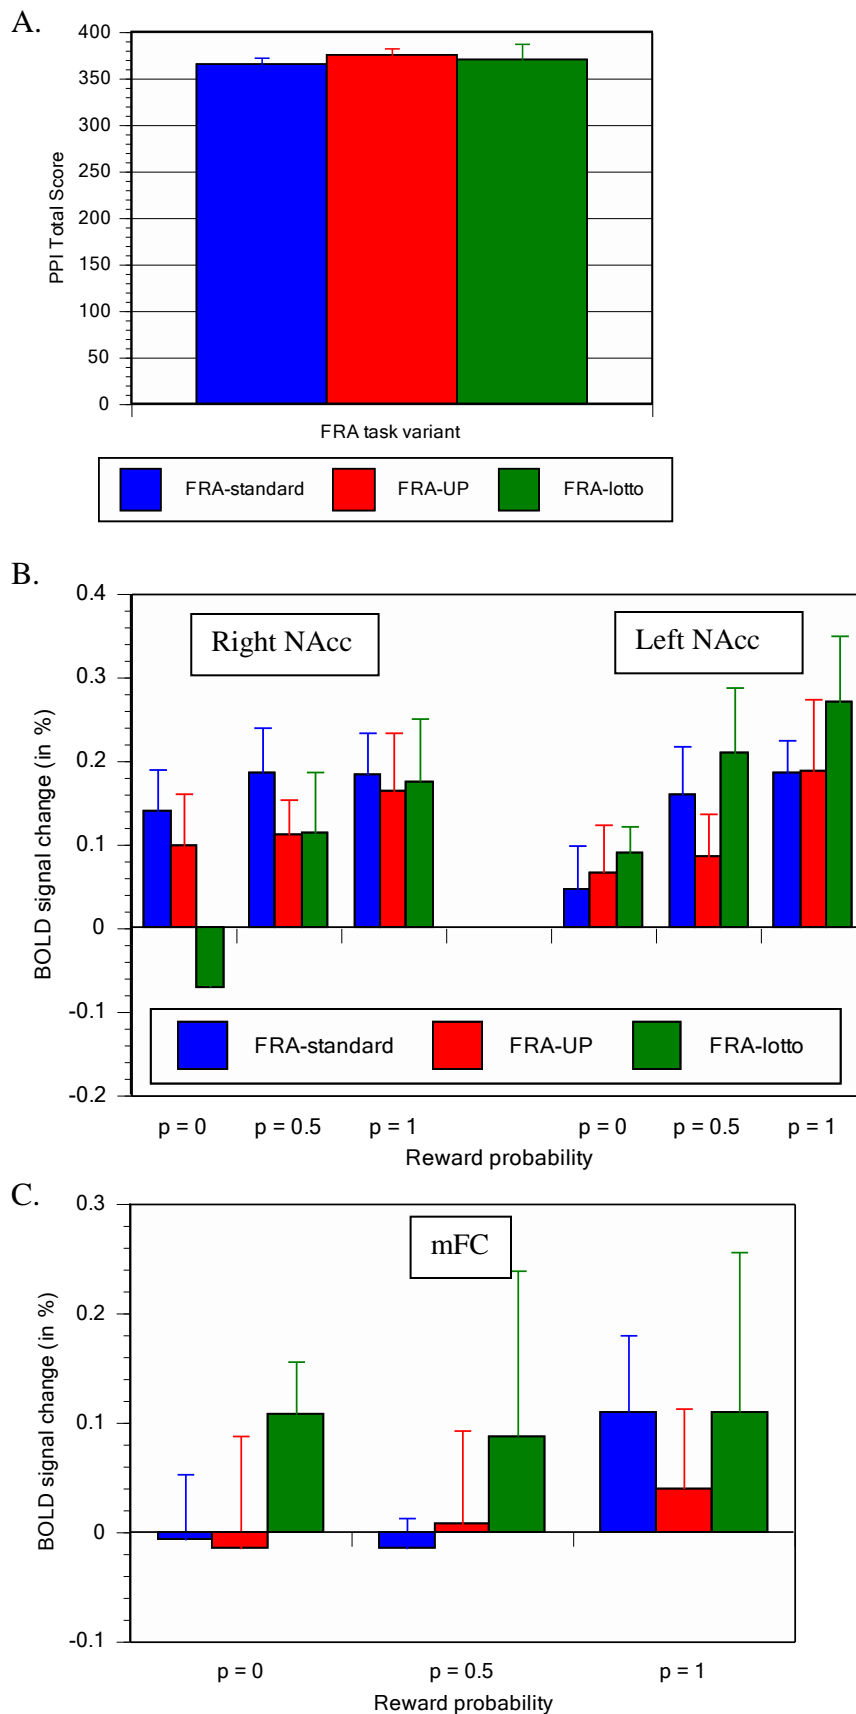

Total PPI scores did not differ as a function of FRA task variant (part A) (ANOVA  $P = .69$ ). In both right and left nucleus accumbens (NAcc) VOI, mean peak modeled BOLD signal change also did not significantly differ (ANOVA  $P > .10$ ) by task version for any response trial type (Part B). In the mesofrontal cortex (mFC) VOI, mean peak modeled BOLD signal change did not significantly differ (ANOVA  $P > .10$ ) by task variant for any nonresponse trial type (Part C).
