# Supplementary material
Source: PubMed Central journal article supplement (PMC3269887)
Supplement: NIHMS346796-supplement-02.pdf [file NIHMS346796-supplement-02.pdf]

Supplemental Figure S2.

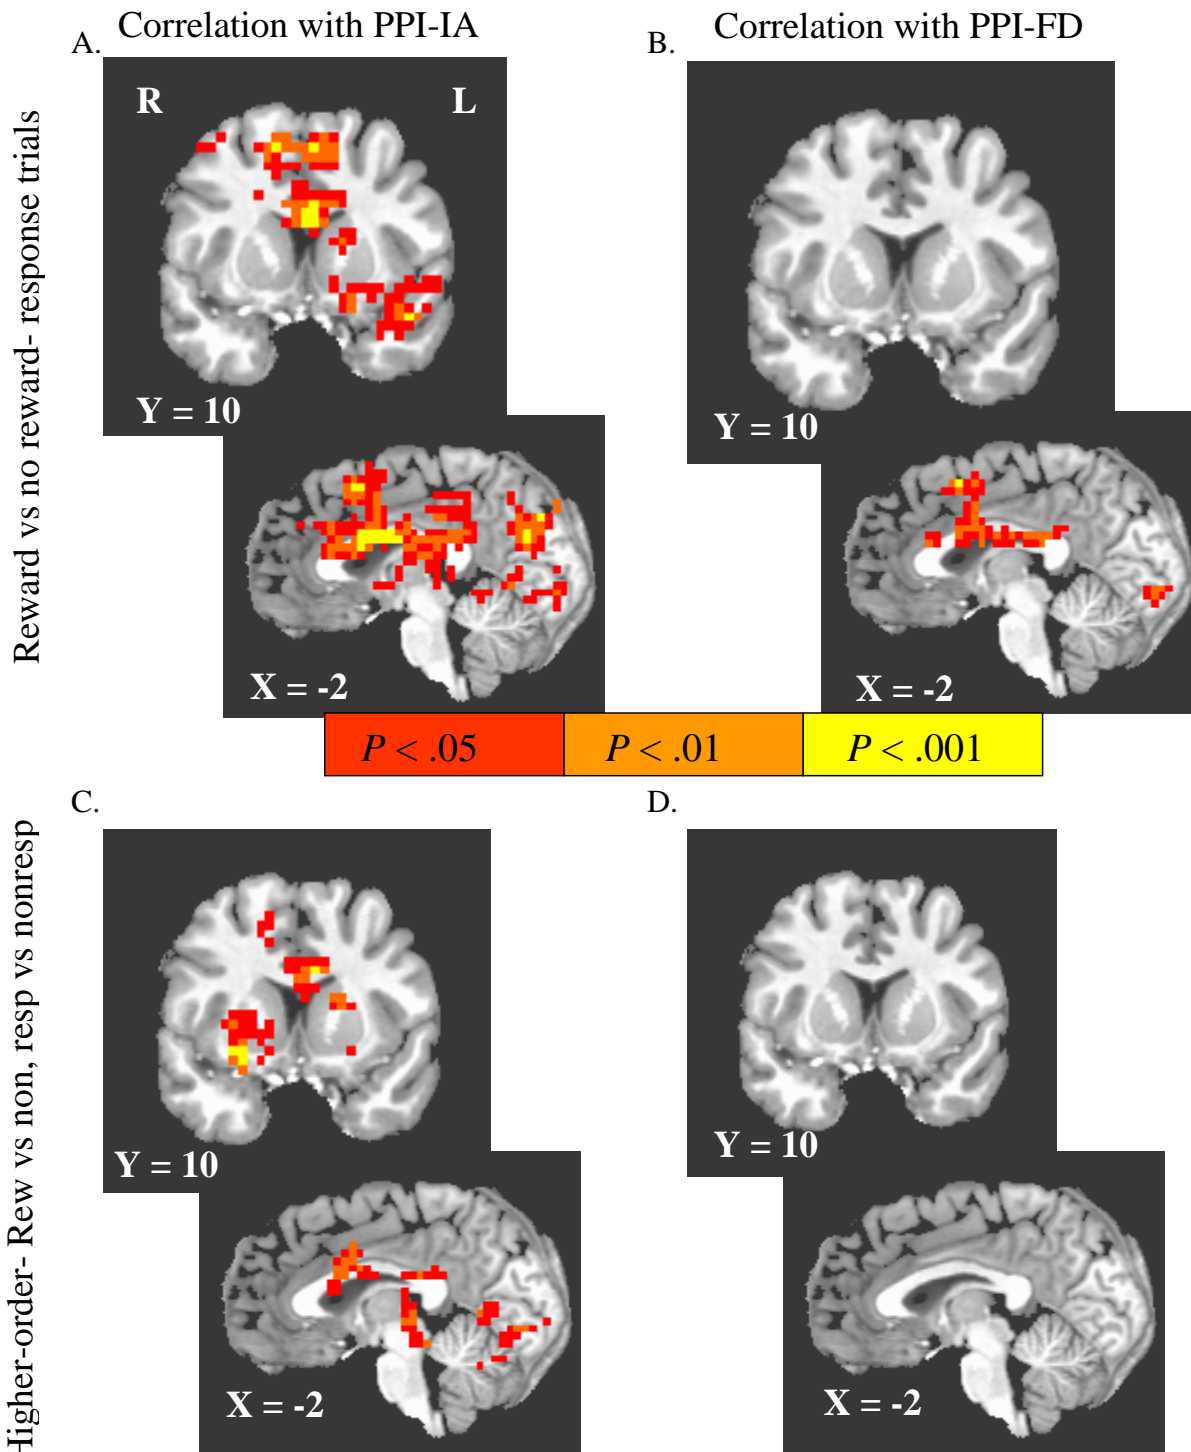

Voxelwise correlations between the two main PPI factor scores and activation by FRA task contrasts. Illuminated voxels indicate where activation by the contrast between anticipation of responding for potential reward ( $p = 1.0$  or  $p = 0.5$ ) versus nonreward ( $p = 0$ ) correlated with PPI-Impulsive Antisociality factor scores (A) and PPI- Fearless Dominance scores (B). in trials where subjects were to withhold responding to a target, and received rewards passively. Panels C and D depict PPI factor correlations with activation by a higher-order contrast of activations in A, B after subtracting out the contrast of activation by anticipation of passively-received reward versus nonreward. All illuminated voxel clusters survive family-wise error-rate correction for multiple-comparisons to adjusted  $P < .05$ . There were no voxel clusters that showed a correlation between PPI factor scores and passive reward anticipation in the nonresponse trial types.
