# Supplementary material
Source: PubMed Central journal article supplement (PMC3269887)
Supplement: NIHMS346796-supplement-supplement_1.pdf [file NIHMS346796-supplement-supplement_1.pdf]

1  
2 Supplemental Methods:  
3  
4  
5  
6

7 The Factorial Reward Anticipation (FRA) task and its variants:  
8  
9

10 *Original FRA task (FRA-standard):* This task was administered to 17 subjects (nine  
11 males). The FRA task was administered across three 8-minute scanning runs. Task stimuli were  
12 white on a black background, and were projected on a screen and viewed with a head coil mirror.  
13  
14 Six trial types (18 instances of each of the six trial types across all three scanning runs) were  
15 pseudo-randomly presented, and were separated by a jittered inter-trial interval (2-8 s) with  
16 fixation crosshair. Each trial lasted 6 s, and featured an anticipatory cue (500 ms), a target (500  
17 ms), and trial feedback (2000 ms)(Figure 1, top). Response trials (square cues) required the  
18 subject to respond on a button box while the subsequent target, a white square, was presented. A  
19 square enclosing a “\$” (square-\$ trials), a “?” (square-? trials), or a “0” (square-0 trials) signaled  
20 1.0, 0.5, and 0 probabilities, respectively, of winning \$1 for hitting the target. Non-response  
21 trials (circle cue series) instructed the subject to withhold a response while the forthcoming target  
22 was presented. A circle enclosing a “\$” (circle-\$ trials), a “?” (circle-? trials), or a “0”(circle-0  
23 trials) indicated 1.0, 0.5, and 0 probabilities, respectively, of passive receipt of \$1 after the target  
24 was presented. Reward presentation occurred per the programmed outcome regardless of  
25 whether the subject withheld a response to the target. The uniform 500 ms target presentation  
26 was roughly twice the mean reaction time (RT) of the slowest subjects in MID task variant in  
27 order to ensure a successful response if subjects were attending to the task. Indeed, hit rates in  
28 response trials) were 96.7% in  $p = 1.0$  and  $p = 0.5$  trials, and 94.2 % in  $p = 0$  trials (Bjork &  
29 Hommer, 2007). During feedback, current trial and cumulative winnings were presented.  
30  
31  
32  
33  
34  
35  
36  
37  
38  
39  
40  
41  
42  
43  
44  
45  
46  
47  
48  
49  
50  
51  
52  
53  
54  
55

56 *FRA with uninstructed probabilities (FRA-UP):* This variant was administered to nine  
57 subjects (six males) in a pilot experiment intended to elicit brain activation related to reward  
58  
59  
60  
61  
62  
63  
64  
65

1 Brain recruitment by rewards and psychopathy 21  
2 probability computation (ostensibly in parietal lobe (Dehaene, Molko, Cohen, & Wilson, 2004)),  
3  
4 in addition to assessing VS recruitment as a function of certain vs uncertain probability of  
5  
6 payoff. The FRA-UP was identical to the FRA-standard in all respects, except that subjects were  
7  
8 not instructed about the exact probability of payoff signaled by the square-? and circle-?  
9  
10 anticipatory cues. Subjects were simply told that "...if you see a question mark, there is a chance  
11  
12 you will win a dollar if you hit the target. You might win a dollar, or you might win nothing."  
13  
14  
15

16  
17 *FRA with skewed distribution of trial payoffs (FRA-lotto):* This version was administered to  
18  
19 five subjects (three males) in pilot experiment intended to obtain preliminary evidence of  
20  
21 whether mesolimbic anticipatory activation to a *mean* \$1 reward with a chance for a very large  
22  
23 reward would differ from that elicited by a uniform, explicit \$1 reward (in the FRA-standard task  
24  
25 variant). In the FRA-lotto, the stimulus timing was identical to FRA-standard, but the uniform  
26  
27 \$1 reward of FRA-standard trials was replaced with a "draw," (Figure 1, bottom) which signified  
28  
29 the eligibility to draw a colored marble out of a cloth bag for winnings after the scan, where  
30  
31 different colored marbles signified a different payoff amount for that draw. For example,  
32  
33 successfully hitting the target in a square-? trial would result in feedback of "+1 draw", along  
34  
35 with the cumulative number of marble draws won. A perfect performance would yield 54  
36  
37 marble-draws after the scan.  
38  
39  
40  
41  
42

43  
44 The draw bag contained 200 marbles. Black marbles ( $n = 174$ ) each resulted in a 25¢  
45  
46 payoff, yellow marbles ( $n = 16$ ) each resulted in a \$1 payoff, pink marbles ( $n = 6$ ) each resulted  
47  
48 in a \$5 payoff, blue marbles ( $n = 3$ ) each resulted in a \$20 payoff, and a single white marble in  
49  
50 the bag resulted in a \$50 payoff. This distribution was programmed such that the mean payoff  
51  
52 for a trial (a marble draw) was approximately \$1, except that this skewed distribution of payoffs  
53  
54 featured a handful of exceptionally high-magnitude potential payoffs. Prior to scanning, the 200  
55  
56 marbles were displayed on two trays, and subjects were told: "As you can see from these trays,  
57  
58  
59  
60  
61  
62  
63  
64  
65

1  
2 there are 200 marbles of different colors. The color of the marble determines how much money  
3  
4 it is worth, ranging from 25 cents to 50 dollars. The average value of a marble is one dollar.”

5  
6  
7 After scanning, the subject drew his or her marbles from the bag as was paid based on the  
8  
9 marbles actually drawn.

### 10 11 12 13 14 Psychopathic Personality Inventory (PPI):

15  
16 The PPI (Lilienfeld & Andrews, 1996) is a 187-item questionnaire on which subjects rate  
17  
18 on 4-point Likert scales their endorsements of personality traits and behaviors across eight  
19  
20 subscales. As part of participation in another investigation, the PPI was administered to 17  
21  
22 subjects who completed the FRA-standard task, nine subjects who completed the FRA-UP task,  
23  
24 and five subjects who completed the FRA-lotto task. The PPI subscales have been factor  
25  
26 analyzed into two principal components when administered to a community sample (Benning, et  
27  
28 al., 2003). The first is Impulsive Antisociality (PPI-IA), which is derived from the Impulsive  
29  
30 Nonconformity, Blame Externalization, Machiavellian Egocentricity, and Carefree  
31  
32 Nonplanfulness. The second is Fearless Dominance (PPI-FD), which is derived from Social  
33  
34 Potency, Stress Immunity, and Fearlessness. The eighth subscale, Coldheartedness, did not load  
35  
36 into either factor. We calculated PPI-IA and PPI-FD scores and entered these values into  
37  
38 MEMA as a continuous covariate (explained below).  
39  
40  
41  
42  
43  
44  
45  
46  
47  
48

### 49 fMRI data collection and analysis

50  
51 *fMRI acquisition:* We used a 3 T scanner (General Electric, Milwaukee, WI) and a  
52  
53 quadrature head coil. The same scanner was used for all task variants. We collected 24 3.8-mm-  
54  
55 thick axial slices with a 1 mm interslice gap. In-plane resolution was 3.75 X 3.75 mm.

56  
57  
58 Functional scans were acquired using a T2\*-sensitive echoplanar sequence with a repetition time  
59  
60  
61  
62  
63  
64  
65

1 Brain recruitment by rewards and psychopathy 23  
2 (TR) = 2000 msec, echo time (TE) = 40 msec, flip = 90°. Structural scans were acquired using a  
3  
4 T1-weighted MP-RAGE sequence (TR, 100 msec; TE, 7 msec; flip, 90°) for co-registration of  
5  
6 functional data. Each subject's head was immobilized by a deflatable head restraint.  
7  
8

9 *fMRI pre-processing:* Blood Oxygen-Level Dependent (BOLD) signal was analyzed using  
10  
11 Analysis of Functional NeuroImages (AFNI) software (Cox, 1996). Time-series datasets were  
12  
13 time-shifted to approximate simultaneous slice acquisition, warped into Talairach space as  
14  
15 3.75mm isotropic voxels, corrected for head motion, and spatially smoothed to a uniform 8mm  
16  
17 full-width half maximum in brain voxels. Processed time series were modeled with canonical  
18  
19 gammavariate hemodynamic responses time-locked to anticipatory cues. Canonical  
20  
21 hemodynamic responses were scaled so that beta weights (partial correlations) would reflect  
22  
23 percent-signal-change. The drifting effect in the signal was fitted with extended polynomials for  
24  
25 each run.  
26  
27  
28  
29

30  
31 *Additional fMRI statistical analysis:*  
32

33  
34 Our task design enabled a third, higher-order contrast to further isolate *motivation*-related  
35  
36 mesolimbic recruitment- that is, activation specific to the joint presence of a potential reward  
37  
38 together with the requirement to make an instrumental response for it (Bjork & Hommer, 2007;  
39  
40 Elliott, Newman, Longe, & William Deakin, 2004). This was calculated as activation during  
41  
42 anticipation of responding for potential reward (square- \$ + ?) versus anticipation of responding  
43  
44 for no reward (square-0), where this contrast was itself masked by (i.e. subtracted by) the  
45  
46 contrast of passive receipt of potential reward (circle- \$ + ?) versus passive nonreward (circle-0).  
47  
48  
49

50  
51 Individual subject maps of linear contrast t-statistics were incorporated to create taskwise  
52  
53 group maps, as well as maps of task-wise differences using AFNI with a recently-developed  
54  
55 software module, 3dMEMA (<http://afni.nimh.nih.gov/sscc/gangc/MEMA.html>). 3dMEMA uses  
56  
57 a linear mixed-effects multilevel model that incorporates both within-subject and cross-subjects  
58  
59  
60  
61  
62  
63  
64  
65

1 Brain recruitment by rewards and psychopathy 24  
2 variability. Voxelwise correlations between PPI and contrast activations, and assessments of  
3  
4 direct taskwise differences in contrast are detected and reported here only after survival of  
5  
6 family-wise error rate correction to adjusted  $p < .05$  using Monte Carlo simulation (AFNI plug-in  
7  
8 3dClustSim).  
9

10  
11  
12  
13  
14 Volume of interest (VOI) analysis:  
15

16 We wished to characterize which trial types *specifically* were driving the correlations  
17  
18 between PPI scores and mesolimbic activation as detected by event *contrasts*. We therefore  
19  
20 extracted signal change in a VOI analysis of the nucleus accumbens (NAcc), which is  
21  
22 consistently recruited by the MID task as a marker of motivation (Bjork et al., 2004; Knutson, et  
23  
24 al., 2001; Knutson, Taylor, Kaufman, Peterson, & Glover, 2005; Scheres, Milham, Knutson, &  
25  
26 Castellanos, 2007). To avoid circularity of statistical inference (Kriegeskorte, Simmons,  
27  
28 Bellgowan, & Baker, 2009; Vul, Harris, Winkielman, & Pasher, 2009), the masks were not  
29  
30 placed at activation or correlation maxima observed in the statistical maps, but rather were  
31  
32 anatomically localized *a priori* in the NAcc (see Figure 2, part C, inset) (Haber & Knutson,  
33  
34 2010) at the intersection of the caudate and the putamen in the coronal plane (Talairach  $y = 10$ )  
35  
36 most consistently activated in previous reports with the mid task. These masks were in fact the  
37  
38 identical files invoked in a different dataset and investigation (Bjork, Smith, Chen, & Hommer,  
39  
40 2010), and each mask was comprised of two contiguous 3.75mm cubic voxels. Each subject's  
41  
42 hemodynamic responses were: 1) averaged by anticipatory cue (i.e. trial) type, 2) modeled and  
43  
44 corrected for low-frequency baseline drifts as per the core regression analysis, and 3) passed  
45  
46 through the NAcc masks. These peak modeled signal change values (~6 s lag after cue  
47  
48 presentation) were then correlated with PPI scores in bivariate analyses. We also characterized  
49  
50 which trial type drove the observed contrast between PPI-total scores and recruitment of mFC  
51  
52  
53  
54  
55  
56  
57  
58  
59  
60  
61  
62  
63  
64  
65

1 Brain recruitment by rewards and psychopathy 25  
2 by the contrast between anticipation of passive receipt of potential reward and non-reward in a  
3  
4  
5 *post hoc* descriptive VOI analysis. Here, post-cue signal change was averaged (as above) across  
6  
7 a five-voxel mask drawn in the sagittal plane ( $x = 6$ ) at the observed correlation maxima.  
8  
9  
10  
11
